# Supplementary material for: Electronic properties, skyrmions and bimerons in Janus CrXY (X, Y = S, Se, Te, Cl, Br, I, and X ≠ Y) monolayers
Source: Royal Society of Chemistry journal article supplement (doi:10.1039/d3cp02470a), 2023-01-01
Supplement: d3cp02470a2.pdf [file d3cp02470a2.pdf]

# Journal Name

## ARTICLE TYPE

Cite this: DOI: 00.0000/xxxxxxxxxx

### Supplementary Information for “Electronic properties, skyrmions and bimerons in Janus CrXY (X, Y = S, Se, Te, Cl, Br, I, and $X \neq Y$ ) monolayers”

Zhihao Guan,<sup>a‡</sup> Zhong Shen,<sup>a‡</sup> Yufei Xue,<sup>a</sup> Tingting Zhong,<sup>a</sup> Xiaoping Wu,<sup>a</sup> and Changsheng Song<sup>\*ab</sup>

<sup>a</sup> Key Laboratory of Optical Field Manipulation of Zhejiang Province, Department of Physics, Zhejiang Sci-Tech University, Hangzhou, China. E-mail: cssong@zstu.edu.cn

<sup>b</sup> Longgang Institute of Zhejiang Sci-Tech University, Wenzhou, 325802, China.

‡ These authors contributed equally to this work.

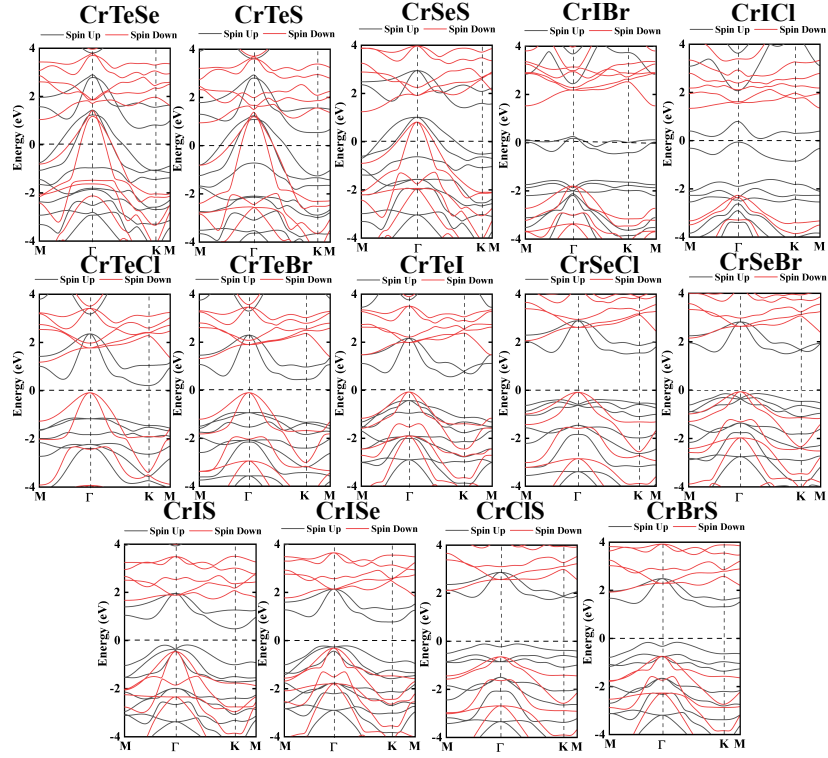

Fig. S1 Band structures of CrXY monolayers with PBE+U.

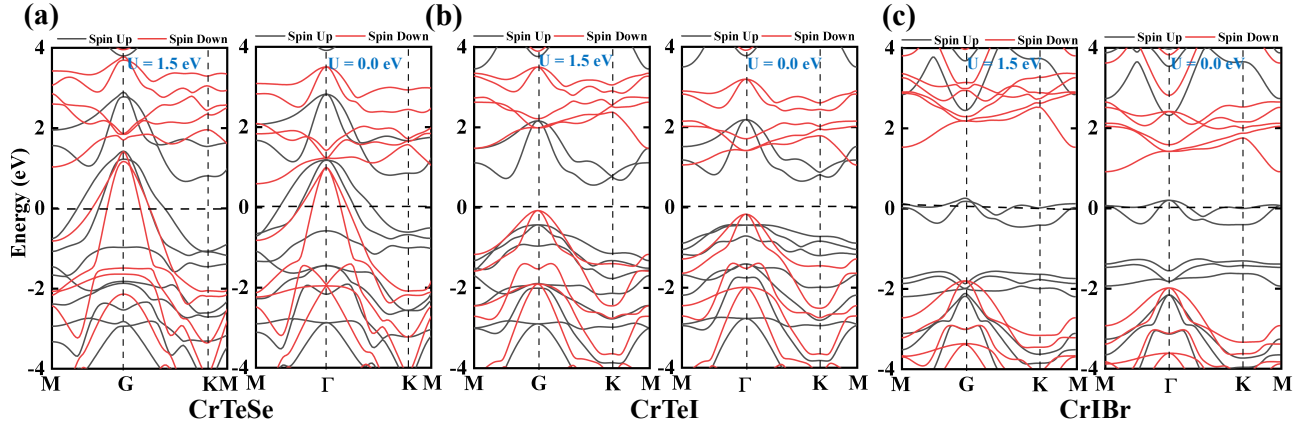

Fig. S2 Band structures by using PBE with  $U = 1.5$  and  $0.0$  eV of (a) CrTeSe, (b) CrTel and (c) CrIBr, respectively.

For the Heisenberg exchange coefficients  $J$ , we can obtain the values by the following four equations:

$$E_1 = 18J_1 + 18J_2 + 18J_3 + E_0, \quad (\text{S1})$$

$$E_2 = -6J_1 - 6J_2 + 18J_3 + E_0, \quad (\text{S2})$$

$$E_3 = -6J_1 + 2J_2 + 2J_3 + E_0, \quad (\text{S3})$$

$$E_4 = -2J_1 - 6J_2 + 2J_3 + E_0. \quad (\text{S4})$$

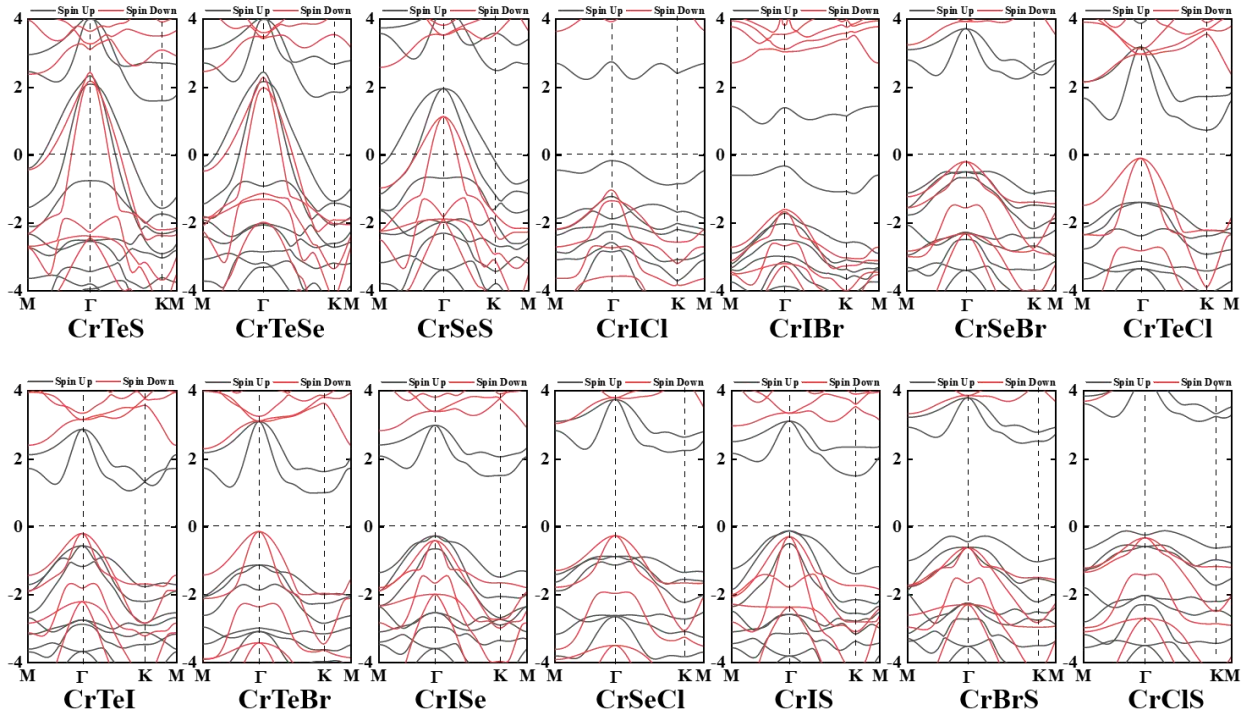

Fig. S3 Band structures of CrXY monolayers with HSE06.

Here,  $E_1, E_2, E_3, E_4$  are the energies with four different spin configurations and  $E_0$  is the spin-independent energy. The  $J_1, J_2, J_3$  are the Heisenberg exchange coefficients of the first, second and third nearest neighbors as shown in Fig.S6 and the values are shown in Table S5.

We have calculated the single-ion anisotropy coefficient ( $K_{single}$ ), MAE constant ( $K_i$ ) and effective anisotropy ( $K_{eff}$ ) of CrXY as shown in Table Rs4.  $K_{eff}$  can be expressed as:

$$K_{eff}t_{eff} = K_i - \frac{1}{2}\mu_0 M_s^2 t_{eff}, \quad (S5)$$

where  $K_{eff}$  is the effective anisotropy per unit volume,  $t_{eff}$  is the thickness of the ferromagnetic layer,  $\mu_0$  is the magnetic constant, and  $M_s$  is the saturation magnetization per unit volume<sup>1</sup>.

The formation energy ( $E_f$ ) is defined by:

$$\Delta H_f = E_{tot} - \sum_i \mu_i x_i, \quad (S6)$$

where  $E_{tot}$  is the DFT total energy of the compound,  $\mu_i$  is the chemical potential of element  $i$  and  $x_i$  is the quantity of element  $i$  in the compound<sup>2</sup>.

**Table S1** The energies with respect to the Fermi level of crystal field splittings of the Cr  $d$  orbitals, the X (Y)  $p$  orbitals and  $pd$  hybridization.

| CrXY   | Energy (eV)               |               |                      |                           |                  |                   |            |                   |            |                   |
|--------|---------------------------|---------------|----------------------|---------------------------|------------------|-------------------|------------|-------------------|------------|-------------------|
|        | Cr- $d$ ( $x^2-y^2, xy$ ) | Cr- $d$ $z^2$ | Cr- $d$ ( $xz, yz$ ) | $pd\pi$ ( $x^2-y^2, xy$ ) | $pd\sigma$ $z^2$ | $pd$ ( $xz, yz$ ) | X- $p$ $z$ | X- $p$ ( $x, y$ ) | Y- $p$ $z$ | Y- $p$ ( $x, y$ ) |
| CrTeSe | -2.94                     | -2.54         | -1.83                | (2.89, 2.78)              | -0.98            | (1.42, 1.22)      | -2.15      | (1.16, 1.41)      | -4.79      | (-1.65, -1.50)    |
| CrTeI  | -2.92                     | -2.03         | -1.92                | 2.15                      | -0.98            | -0.45             | -1.56      | -0.1              | -1.93      | -4.4              |
| CrIBr  | -4.05                     | -5.59         | -1.89                | 0.24                      | -1.89            | 0.24              | -3.03      | -1.82             | -5.21      | -3.41             |

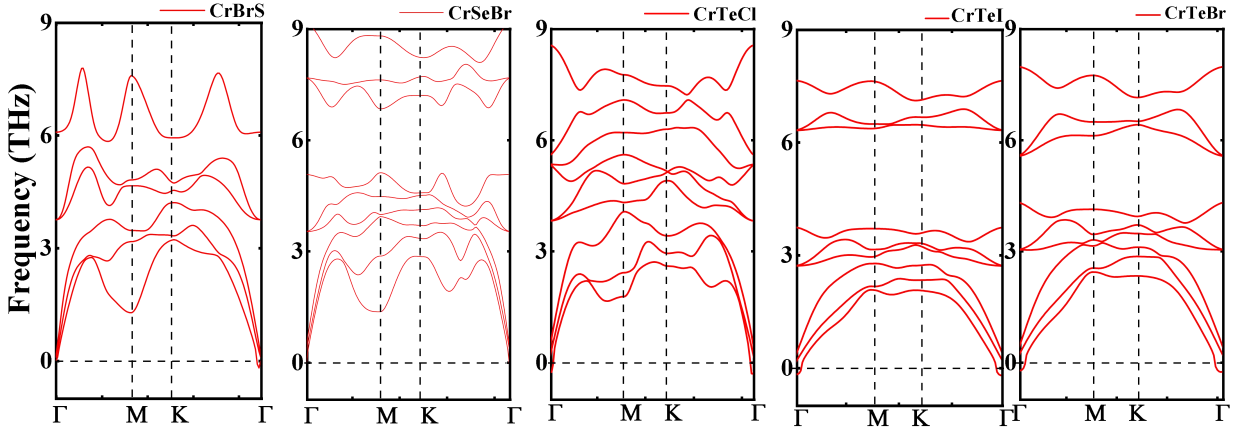

**Fig. S4** Phonon spectra of Janus CrBrS, CrSeBr, CrTeCl, CrTeI and CrTeBr monolayers, respectively.

**Table S2** Charge transfer of CrXY monolayers. Negative values indicate electron gain, and positive values represent electron loss.

|    | CrSeS | CrSCL | CrSeCl | CrTeS | CrTeSe | CrSeBr | CrBrS | CrTeCl | CrTeBr | CrICl | CrIS  | CrISe | CrIBr | CrTeI |
|----|-------|-------|--------|-------|--------|--------|-------|--------|--------|-------|-------|-------|-------|-------|
| Cr | -1.16 | -1.34 | -1.22  | -1.09 | -0.96  | -1.15  | -1.28 | -1.06  | -1.01  | -1.14 | -1.20 | -1.08 | -1.08 | -0.93 |
| X  | 0.47  | 0.62  | 0.61   | 0.35  | 0.37   | 0.62   | 0.53  | 0.41   | 0.44   | 0.48  | 0.41  | 0.43  | 0.48  | 0.47  |
| Y  | 0.69  | 0.72  | 0.61   | 0.74  | 0.59   | 0.53   | 0.75  | 0.65   | 0.57   | 0.66  | 0.79  | 0.65  | 0.6   | 0.46  |

**Table S3** Formation energies  $\Delta H_f$  (eV) of CrXY.

|              | CrSeS | CrSCL | CrSeCl | CrTeS | CrTeSe | CrSeBr | CrBrS | CrTeCl | CrTeBr | CrICl | CrIS  | CrISe | CrIBr | CrTeI |
|--------------|-------|-------|--------|-------|--------|--------|-------|--------|--------|-------|-------|-------|-------|-------|
| $\Delta H_f$ | -1.47 | -1.87 | -1.58  | -1.26 | -0.96  | -1.40  | -1.66 | -1.26  | -1.10  | -1.22 | -1.44 | -1.21 | -0.97 | -0.95 |

**Table S4** Angles  $\theta_1$  and  $\theta_2$ , the paths of superexchange interactions  $r_1$ ,  $r_2$ ,  $r_3$ ,  $r_4$  and the paths of direct interactions  $r_5$  of nearest Cr atoms are shown in Fig.S5. The unit of  $\theta$  and  $r$  are Å and degree, respectively.

|            | CrSeS | CrSeCl | CrSeBr | CrTeS | CrTeSe | CrTeCl | CrTeBr | CrTeI | CrClS | CrBrS | CrIS  | CrISe | CrICl | CrIBr |
|------------|-------|--------|--------|-------|--------|--------|--------|-------|-------|-------|-------|-------|-------|-------|
| $\theta_1$ | 91.76 | 89.38  | 86.37  | 95.7  | 91.43  | 93.13  | 90.00  | 87.29 | 93.89 | 95.94 | 99.30 | 96.08 | 94.19 | 87.10 |
| $\theta_2$ | 81.61 | 90.65  | 92.70  | 75.62 | 78.38  | 86.66  | 88.66  | 91.86 | 86.92 | 83.97 | 81.67 | 83.90 | 88.11 | 93.95 |
| $r_1$      | 2.32  | 2.50   | 2.63   | 2.33  | 2.46   | 2.53   | 2.66   | 2.82  | 2.34  | 2.63  | 2.40  | 2.52  | 2.43  | 2.68  |
| $r_2$      | 2.32  | 2.50   | 2.63   | 2.31  | 2.45   | 2.53   | 2.66   | 2.82  | 2.34  | 2.63  | 2.40  | 2.52  | 3.09  | 2.67  |
| $r_3$      | 2.54  | 2.47   | 2.49   | 2.80  | 2.78   | 2.68   | 2.69   | 2.71  | 2.49  | 2.62  | 2.79  | 2.80  | 3.09  | 2.84  |
| $r_4$      | 2.54  | 2.47   | 2.49   | 2.81  | 2.79   | 2.68   | 2.69   | 2.71  | 2.49  | 2.62  | 2.79  | 2.80  | 2.74  | 2.84  |
| $r_5$      | 3.33  | 3.52   | 3.60   | 3.44  | 3.62   | 2.67   | 3.75   | 3.89  | 3.42  | 3.50  | 3.65  | 3.75  | 4.06  | 3.91  |

**Table S5** Optimized lattice constants  $a$ , electronic structure E.S., magnetic ground state G.S., magnetic anisotropic energy MAE, Heisenberg exchange coefficients  $J_1$ ,  $J_2$  and  $J_3$ , Curie temperature  $T_C$  and the nonlinear magnetic exchange energy DMI in CrXY monolayers.

|        | $a$ (Å) | E.S. | Gap (eV) | G.S. | MAE (meV) | $T_C$ (K) | $J_1$ (meV) | $J_2$ (meV) | $J_3$ (meV) | DMI (meV) |
|--------|---------|------|----------|------|-----------|-----------|-------------|-------------|-------------|-----------|
| CrSeS  | 3.33    | M    | —        | FM   | -1.26     | 65.2      | 0.63        | -4.93       | -0.38       | 0.39      |
| CrSeCl | 3.52    | S    | 1.60     | FM   | -0.16     | 198       | -18.61      | -1.19       | 2.44        | -0.64     |
| CrSeBr | 3.60    | S    | 1.57     | FM   | -0.08     | 247       | -21.90      | -1.08       | 2.07        | -1.20     |
| CrTeS  | 3.44    | M    | —        | FM   | 0.95      | 137       | -19.85      | 0.93        | 2.84        | 0.63      |
| CrTeSe | 3.52    | M    | —        | FM   | 0.75      | 49.1      | -9.12       | 0.34        | 1.63        | 2.03      |
| CrTeCl | 3.67    | S    | 0.30     | FM   | -2.19     | 104       | -11.38      | -2.21       | 7.41        | -1.07     |
| CrTeBr | 3.75    | S    | 0.55     | FM   | -1.76     | 60.2      | -16.80      | -1.88       | 6.26        | -1.81     |
| CrTeI  | 3.89    | S    | 0.64     | FM   | -0.84     | 216       | -22.79      | -1.53       | 4.81        | -3.10     |
| CrSCL  | 3.42    | S    | 1.85     | FM   | 0.05      | 252       | -20.21      | -0.93       | 0.96        | 0.07      |
| CrBrS  | 3.50    | S    | 1.47     | FM   | 0.06      | 371       | -22.00      | -0.84       | 0.75        | 0.38      |
| CrIS   | 3.65    | S    | 0.67     | FM   | 0.07      | 252       | -20.02      | -0.60       | 0.56        | 0.71      |
| CrISe  | 3.75    | S    | 1.00     | FM   | 0.11      | 287       | -23.59      | -0.89       | 1.64        | 1.96      |
| CrICl  | 3.92    | HM   | —        | AFM  | 0.16      | —         | 4.71        | -1.21       | 0.16        | 0.39      |
| CrIBr  | 3.91    | HM   | —        | FM   | 0.78      | 90.3      | -10.86      | 8.95        | -6.31       | -0.36     |



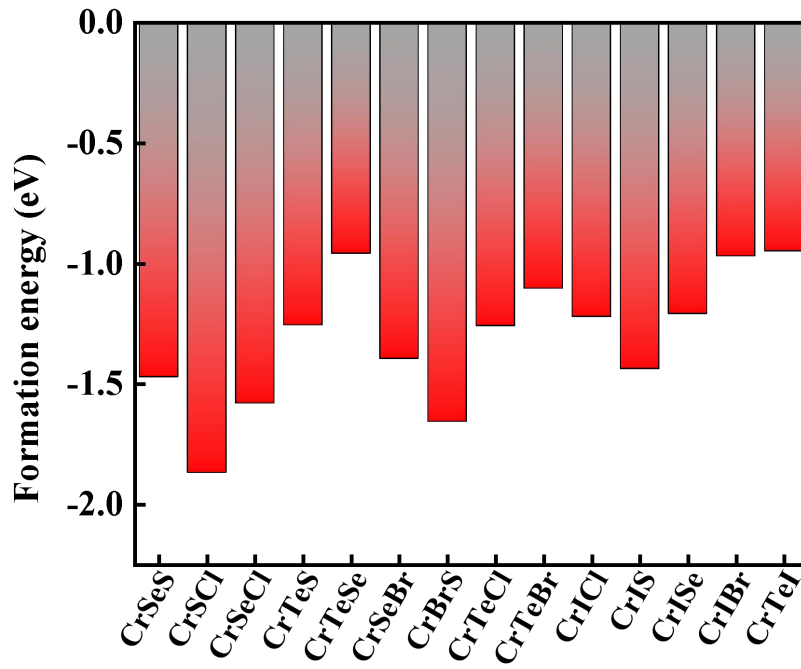

Fig. S5 Formation energies with respect to that of CrTe<sub>2</sub> monolayer as functions of various CrXY monolayers.

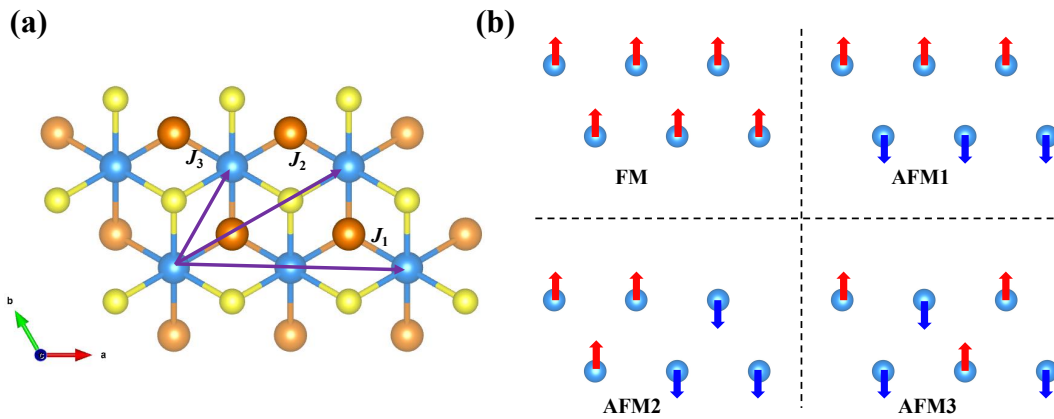

Fig. S6 (a) Heisenberg exchange coefficients  $J_1$ ,  $J_2$  and  $J_3$ ; (b) the ferromagnetic and three antiferromagnetic configurations used to extract the Heisenberg coupling coefficients.

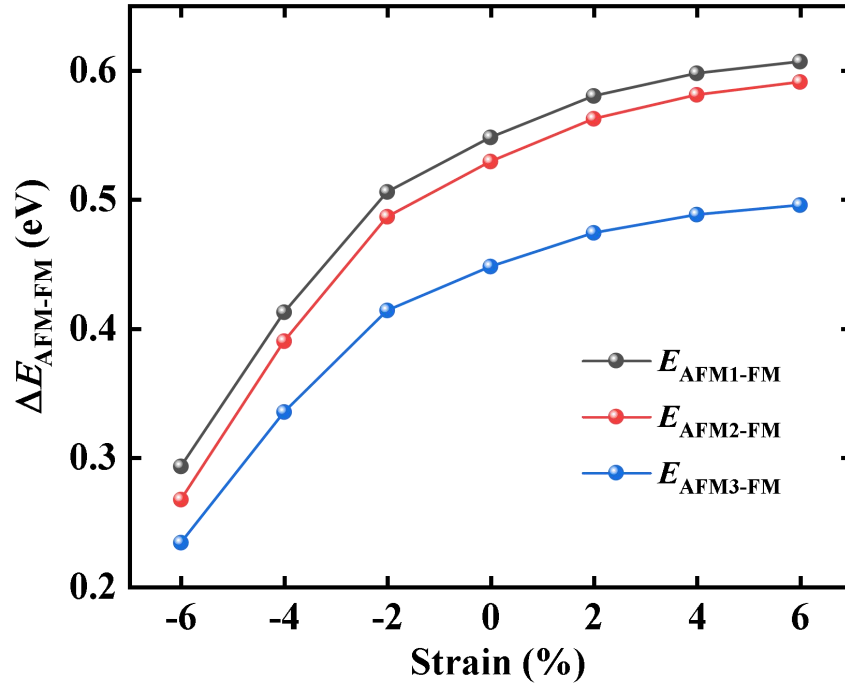

Fig. S7 Energy difference ( $\Delta E$ ) of AFM1, AFM2 and AFM3 spin configurations with respect to FM configuration as functions of strains in CrBrS.

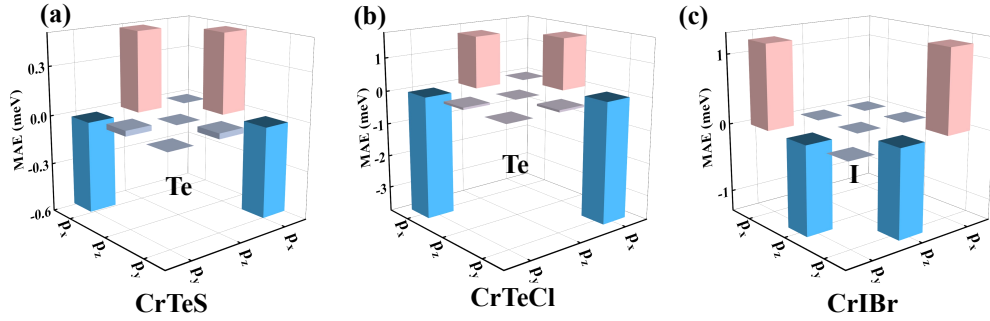

Fig. S8 Te atomic orbitals contribution to MAE in (a) CrTeS and (b) CrTeCl; (c) I atomic orbitals contribution to MAE in CrIBr.

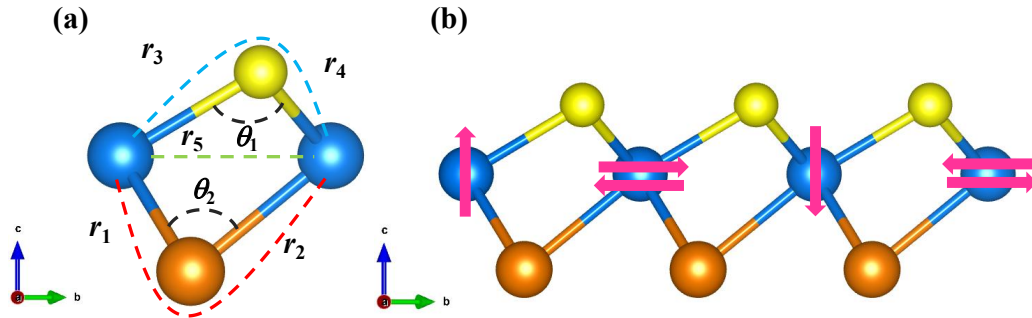

Fig. S9 (a) Schematic of  $\theta_1$ ,  $\theta_2$ , paths of superexchange interactions  $r_1$ ,  $r_2$ ,  $r_3$ ,  $r_4$  and paths of direct interactions  $r_5$ ; (b) clockwise and anticlockwise spin configurations to extract the DMI.

**Table S6** Single-ion anisotropy coefficient ( $K_{single}$ ), MAE constant ( $K_i$ ) and effective anisotropy ( $K_{eff}$ ) of CrXY.

| CrXY   | $K_{single}$ (meV) | $K_i$ (mJ/m <sup>2</sup> ) | $0.5\mu_0 M_s^2 t_{eff}$ (mJ/m <sup>2</sup> ) | $K_{eff}$ (J/cm <sup>3</sup> ) |
|--------|--------------------|----------------------------|-----------------------------------------------|--------------------------------|
| CrSeS  | −1.26              | −2.11                      | 0.22                                          | −15.62                         |
| CrSCl  | 0.05               | 0.08                       | 0.31                                          | −1.70                          |
| CrSeCl | −0.16              | −0.24                      | 0.27                                          | −3.55                          |
| CrTeS  | 0.95               | 1.49                       | 0.23                                          | 7.83                           |
| CrTeSe | 0.75               | 1.13                       | 0.20                                          | 5.58                           |
| CrSeBr | −0.08              | −0.12                      | 0.24                                          | −2.40                          |
| CrBrS  | 0.06               | 0.09                       | 0.27                                          | −1.26                          |
| CrTeCl | −2.19              | −3.00                      | 0.23                                          | −21.38                         |
| CrTeBr | −1.76              | −2.31                      | 0.20                                          | −16.11                         |
| CrICl  | 0.16               | 0.19                       | 0.25                                          | −0.40                          |
| CrIS   | 0.07               | 0.10                       | 0.22                                          | −0.87                          |
| CrISe  | 0.11               | 0.15                       | 0.20                                          | −0.32                          |
| CrIBr  | 0.78               | 0.95                       | 0.26                                          | 4.29                           |
| CrTeI  | −0.84              | −1.023                     | 0.17                                          | −7.40                          |

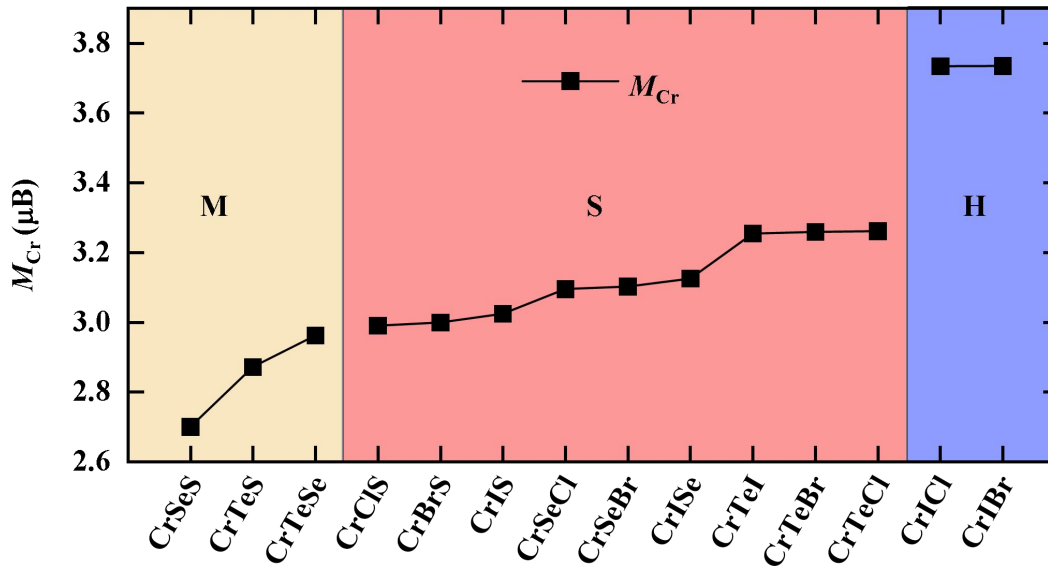

**Fig. S10** Magnetic moments of Cr atoms in CrXY monolayers, where M, S, and H represent metal, semiconductor and half-metal, respectively. We note a significant correlation between the magnetic moment of Cr atoms and the electronegativity of the nonmagnetic atoms

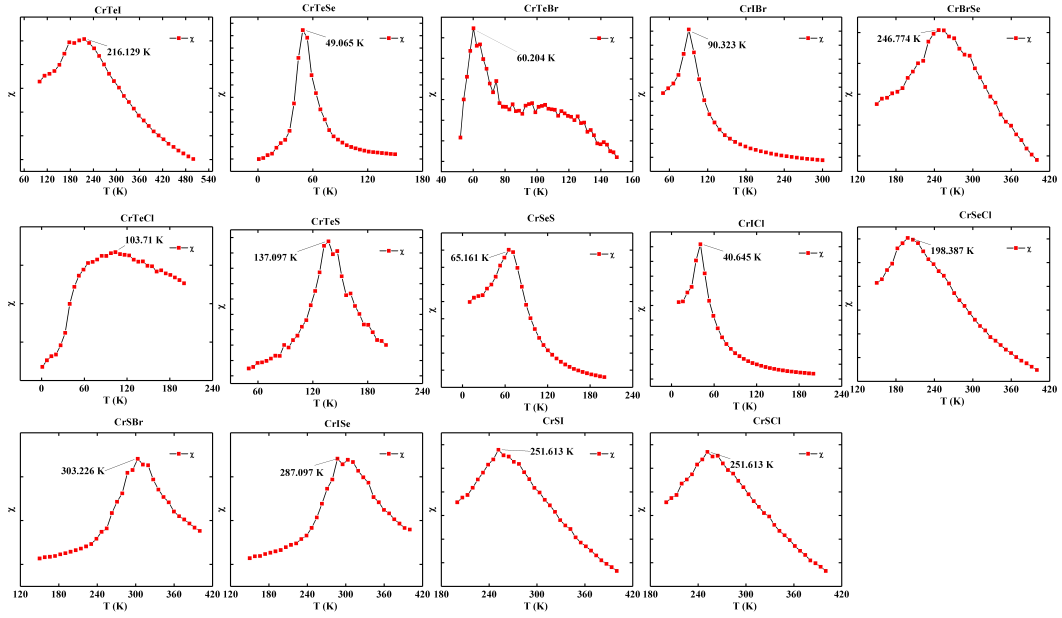

**Fig. S11** Magnetic susceptibility as a function of temperature and the curve exhibits a peak at  $T_C$ , which corresponds to the critical temperature.

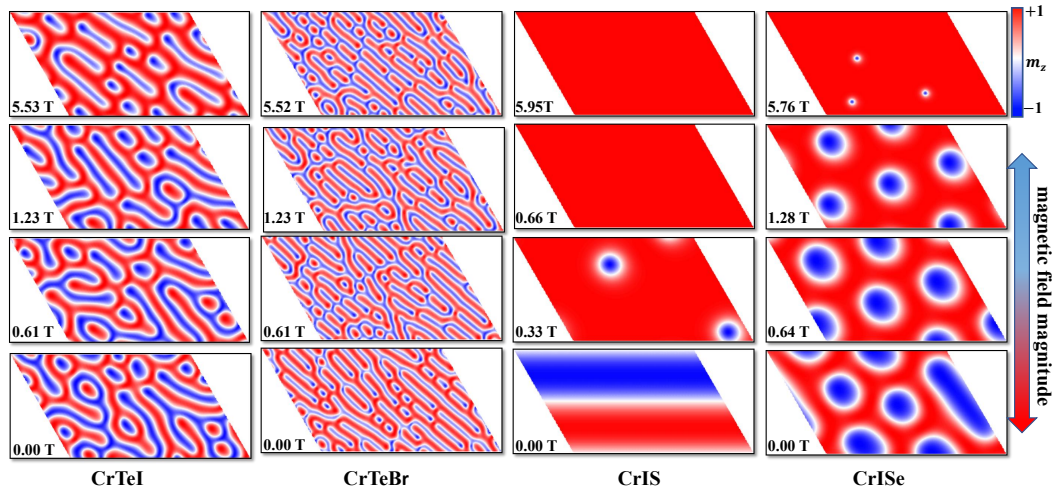

**Fig. S12** Evolutions of spin textures in CrTeI, CrTeBr, CrIS and CrISe with changing magnetic fields at 0 K. In the simulations, a  $60 \times 60 \times 1$  supercell is adopted.

## Notes and references

- 1 S. Jiang, S. Nazir and K. Yang, *Phys. Rev. B*, 2020, **101**, 134405.
- 2 S. Kirklin, J. E. Saal, B. Meredig, A. Thompson, J. W. Doak, M. Aykol, S. Rühl and C. Wolverton, *NPJ Comput. Mater.*, 2015, **1**, 1–15.
