# Supplementary figures and images for: Electronic properties, skyrmions and bimerons in Janus CrXY (X, Y = S, Se, Te, Cl, Br, I, and X ≠ Y) monolayers
Source: Royal Society of Chemistry journal article supplement (doi:10.1039/d3cp02470a), 2023-01-01

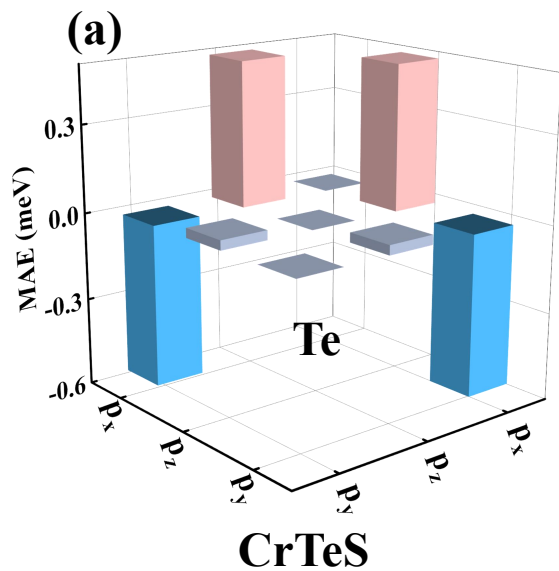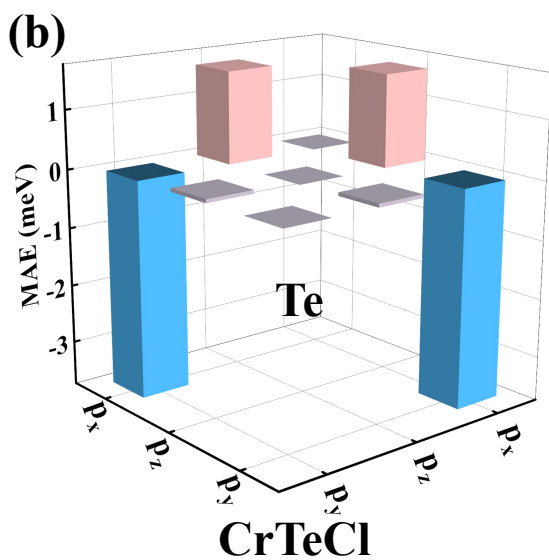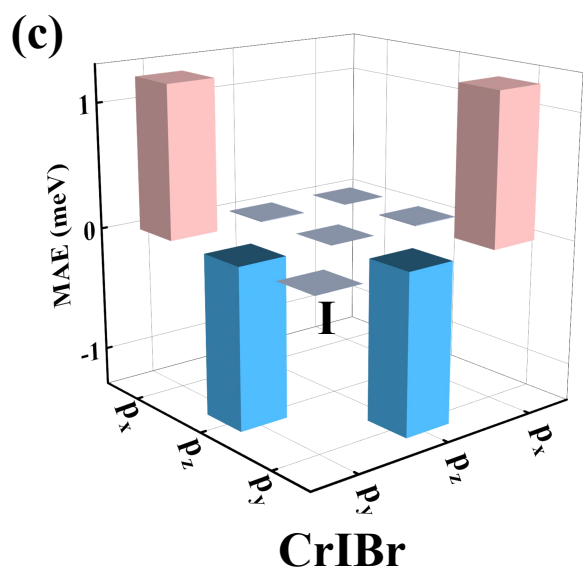

Supplement: d3cp02470a1.zip [file d3cp02470a1.zip]

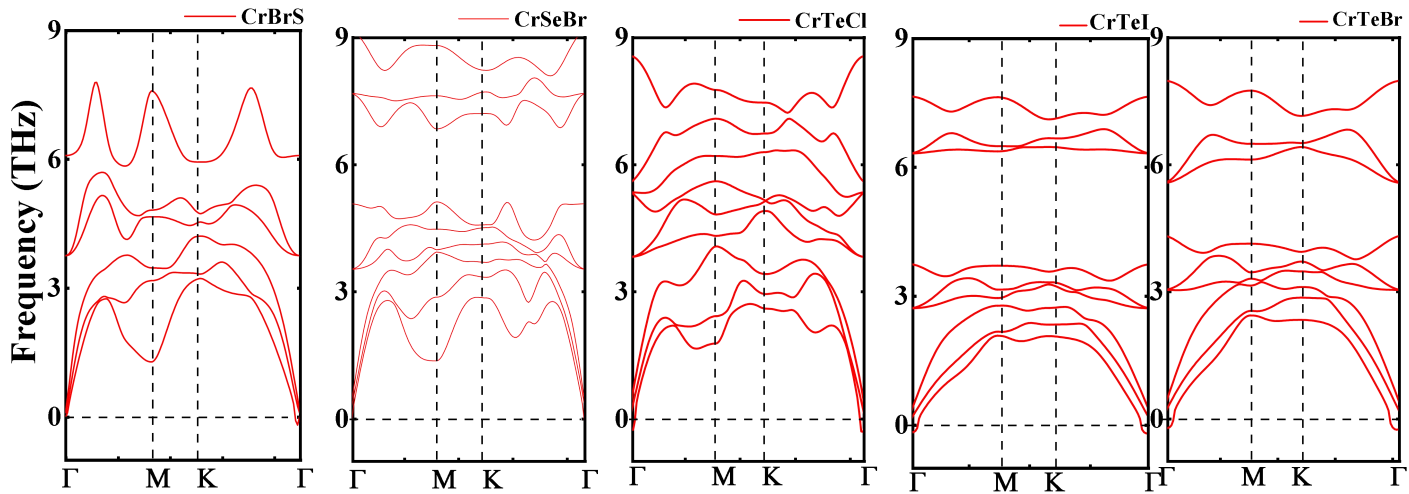

Supplement: d3cp02470a1.zip [file d3cp02470a1.zip]

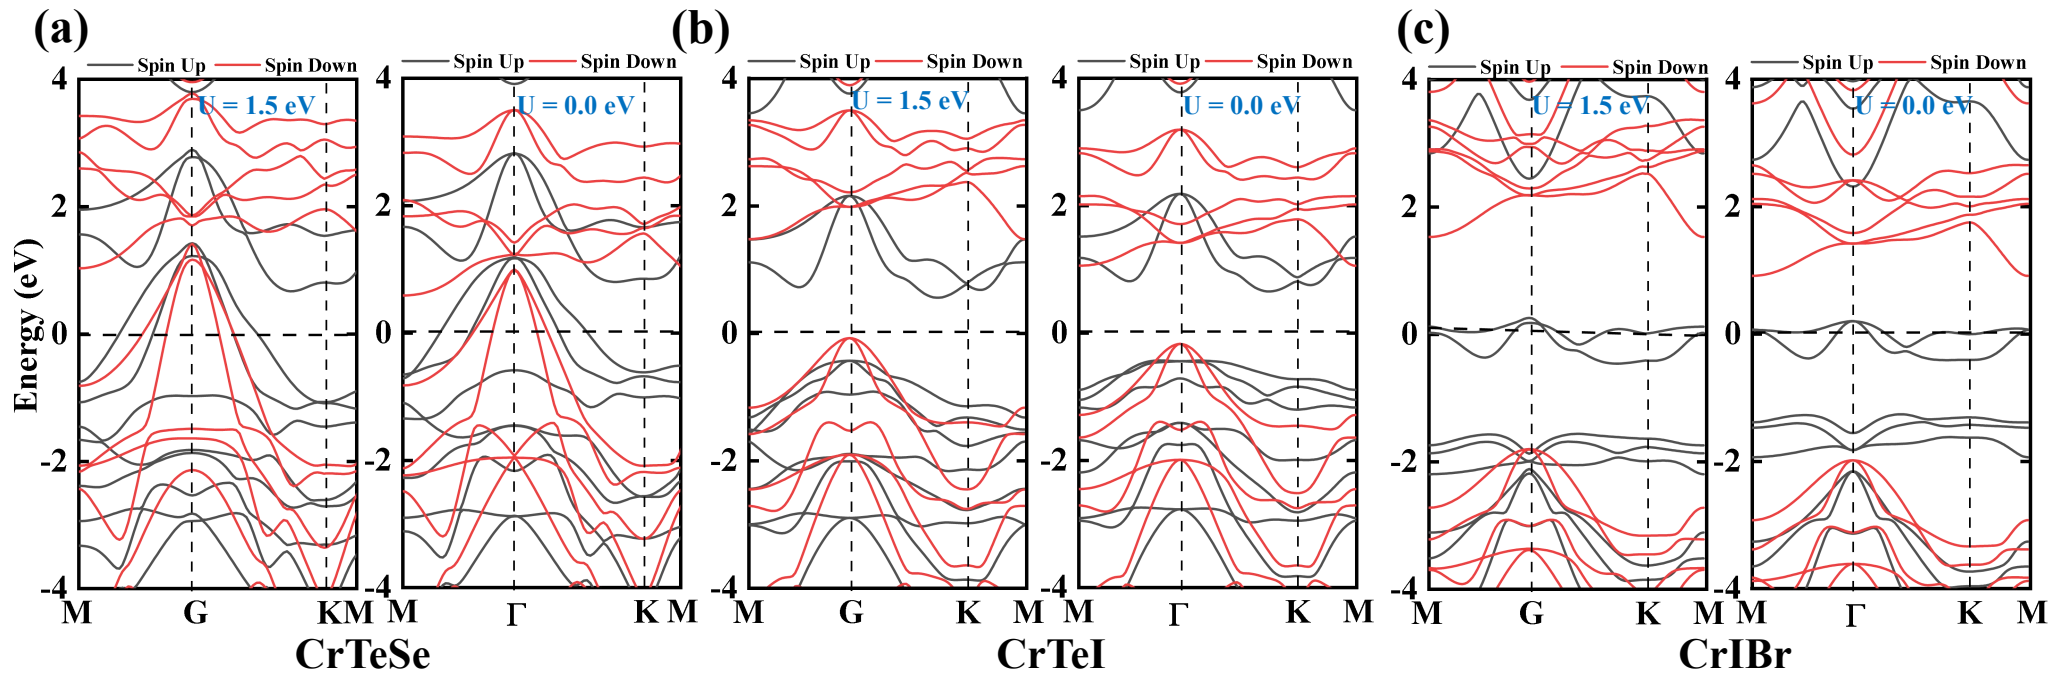

Supplement: d3cp02470a1.zip [file d3cp02470a1.zip]

**(a)**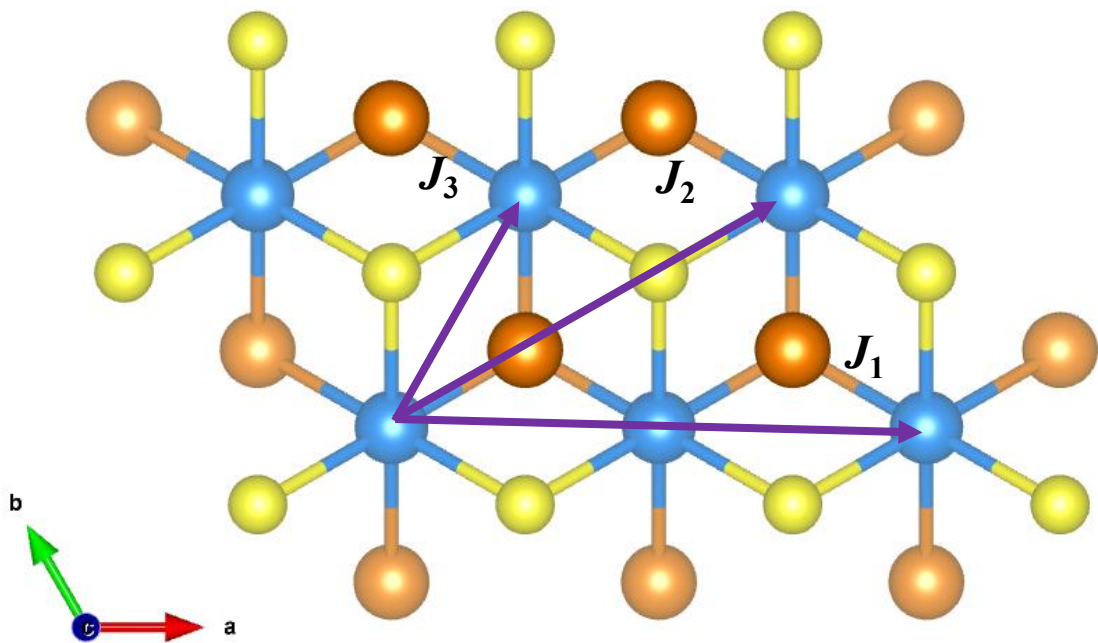**(b)**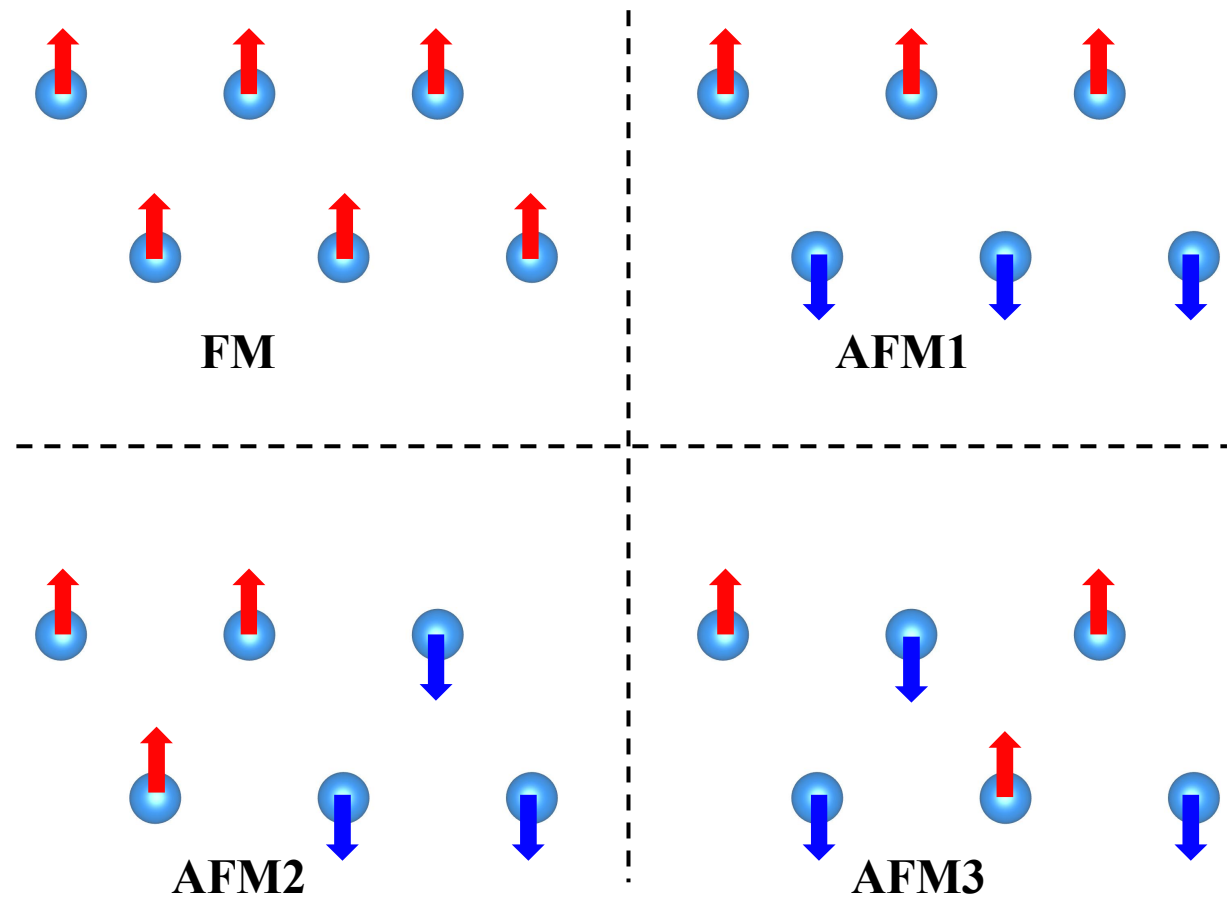

Supplement: d3cp02470a1.zip [file d3cp02470a1.zip]

**CrTeSe**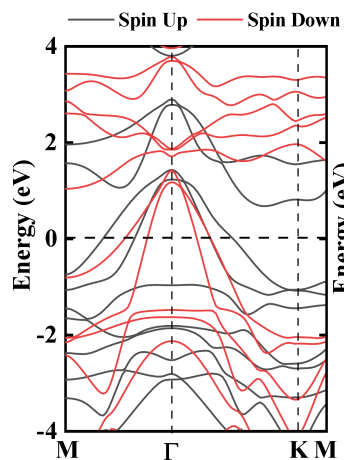**CrTeS**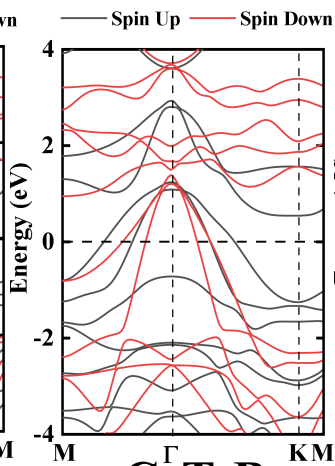**CrSeS**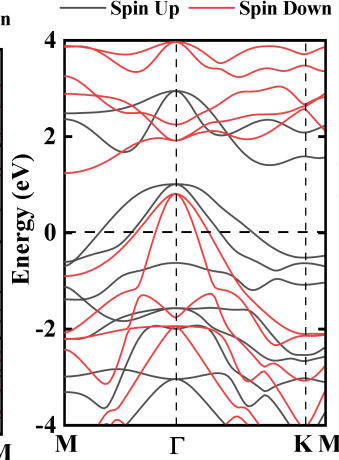**CrIBr**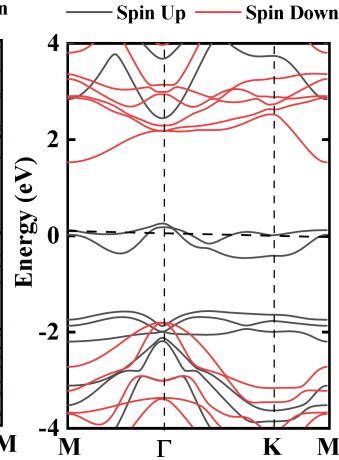**CrICl**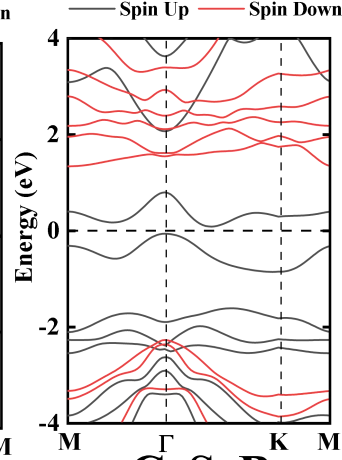**CrTeCl**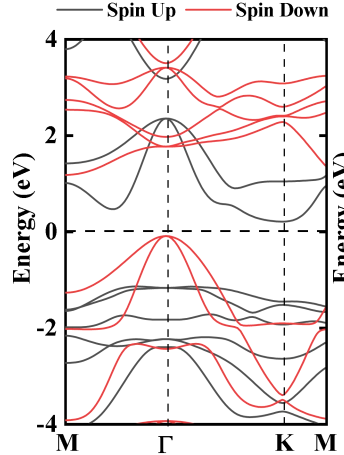**CrTeBr**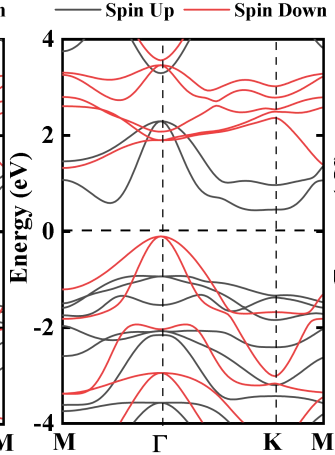**CrTeI**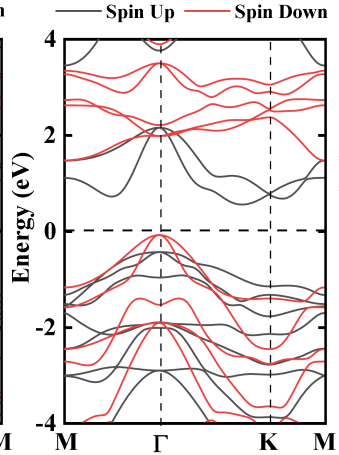**CrSeCl**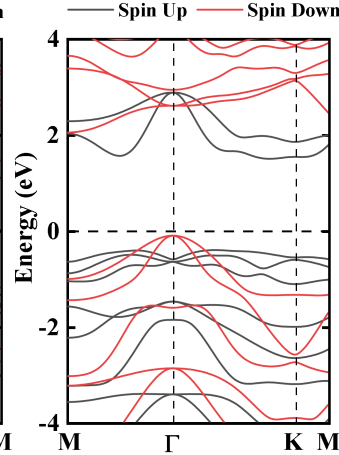**CrSeBr**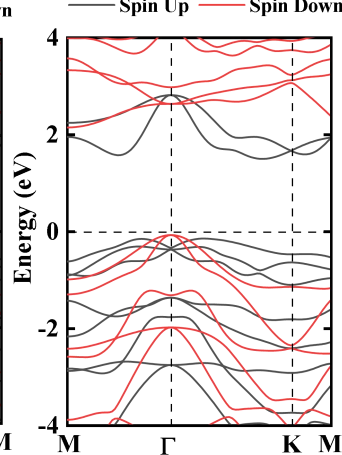**CrIS**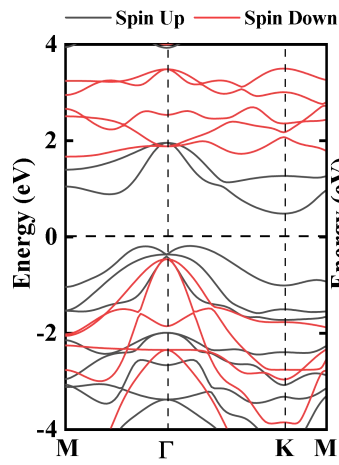**CrISe**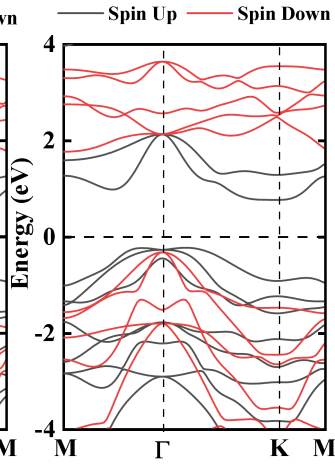**CrClS**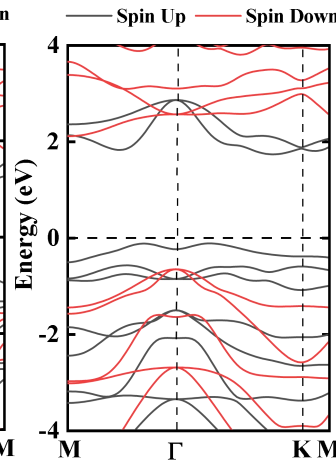**CrBrS**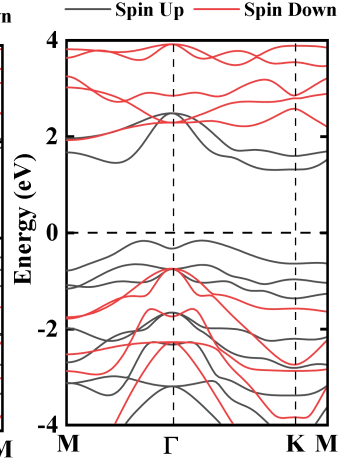

Supplement: d3cp02470a1.zip [file d3cp02470a1.zip]

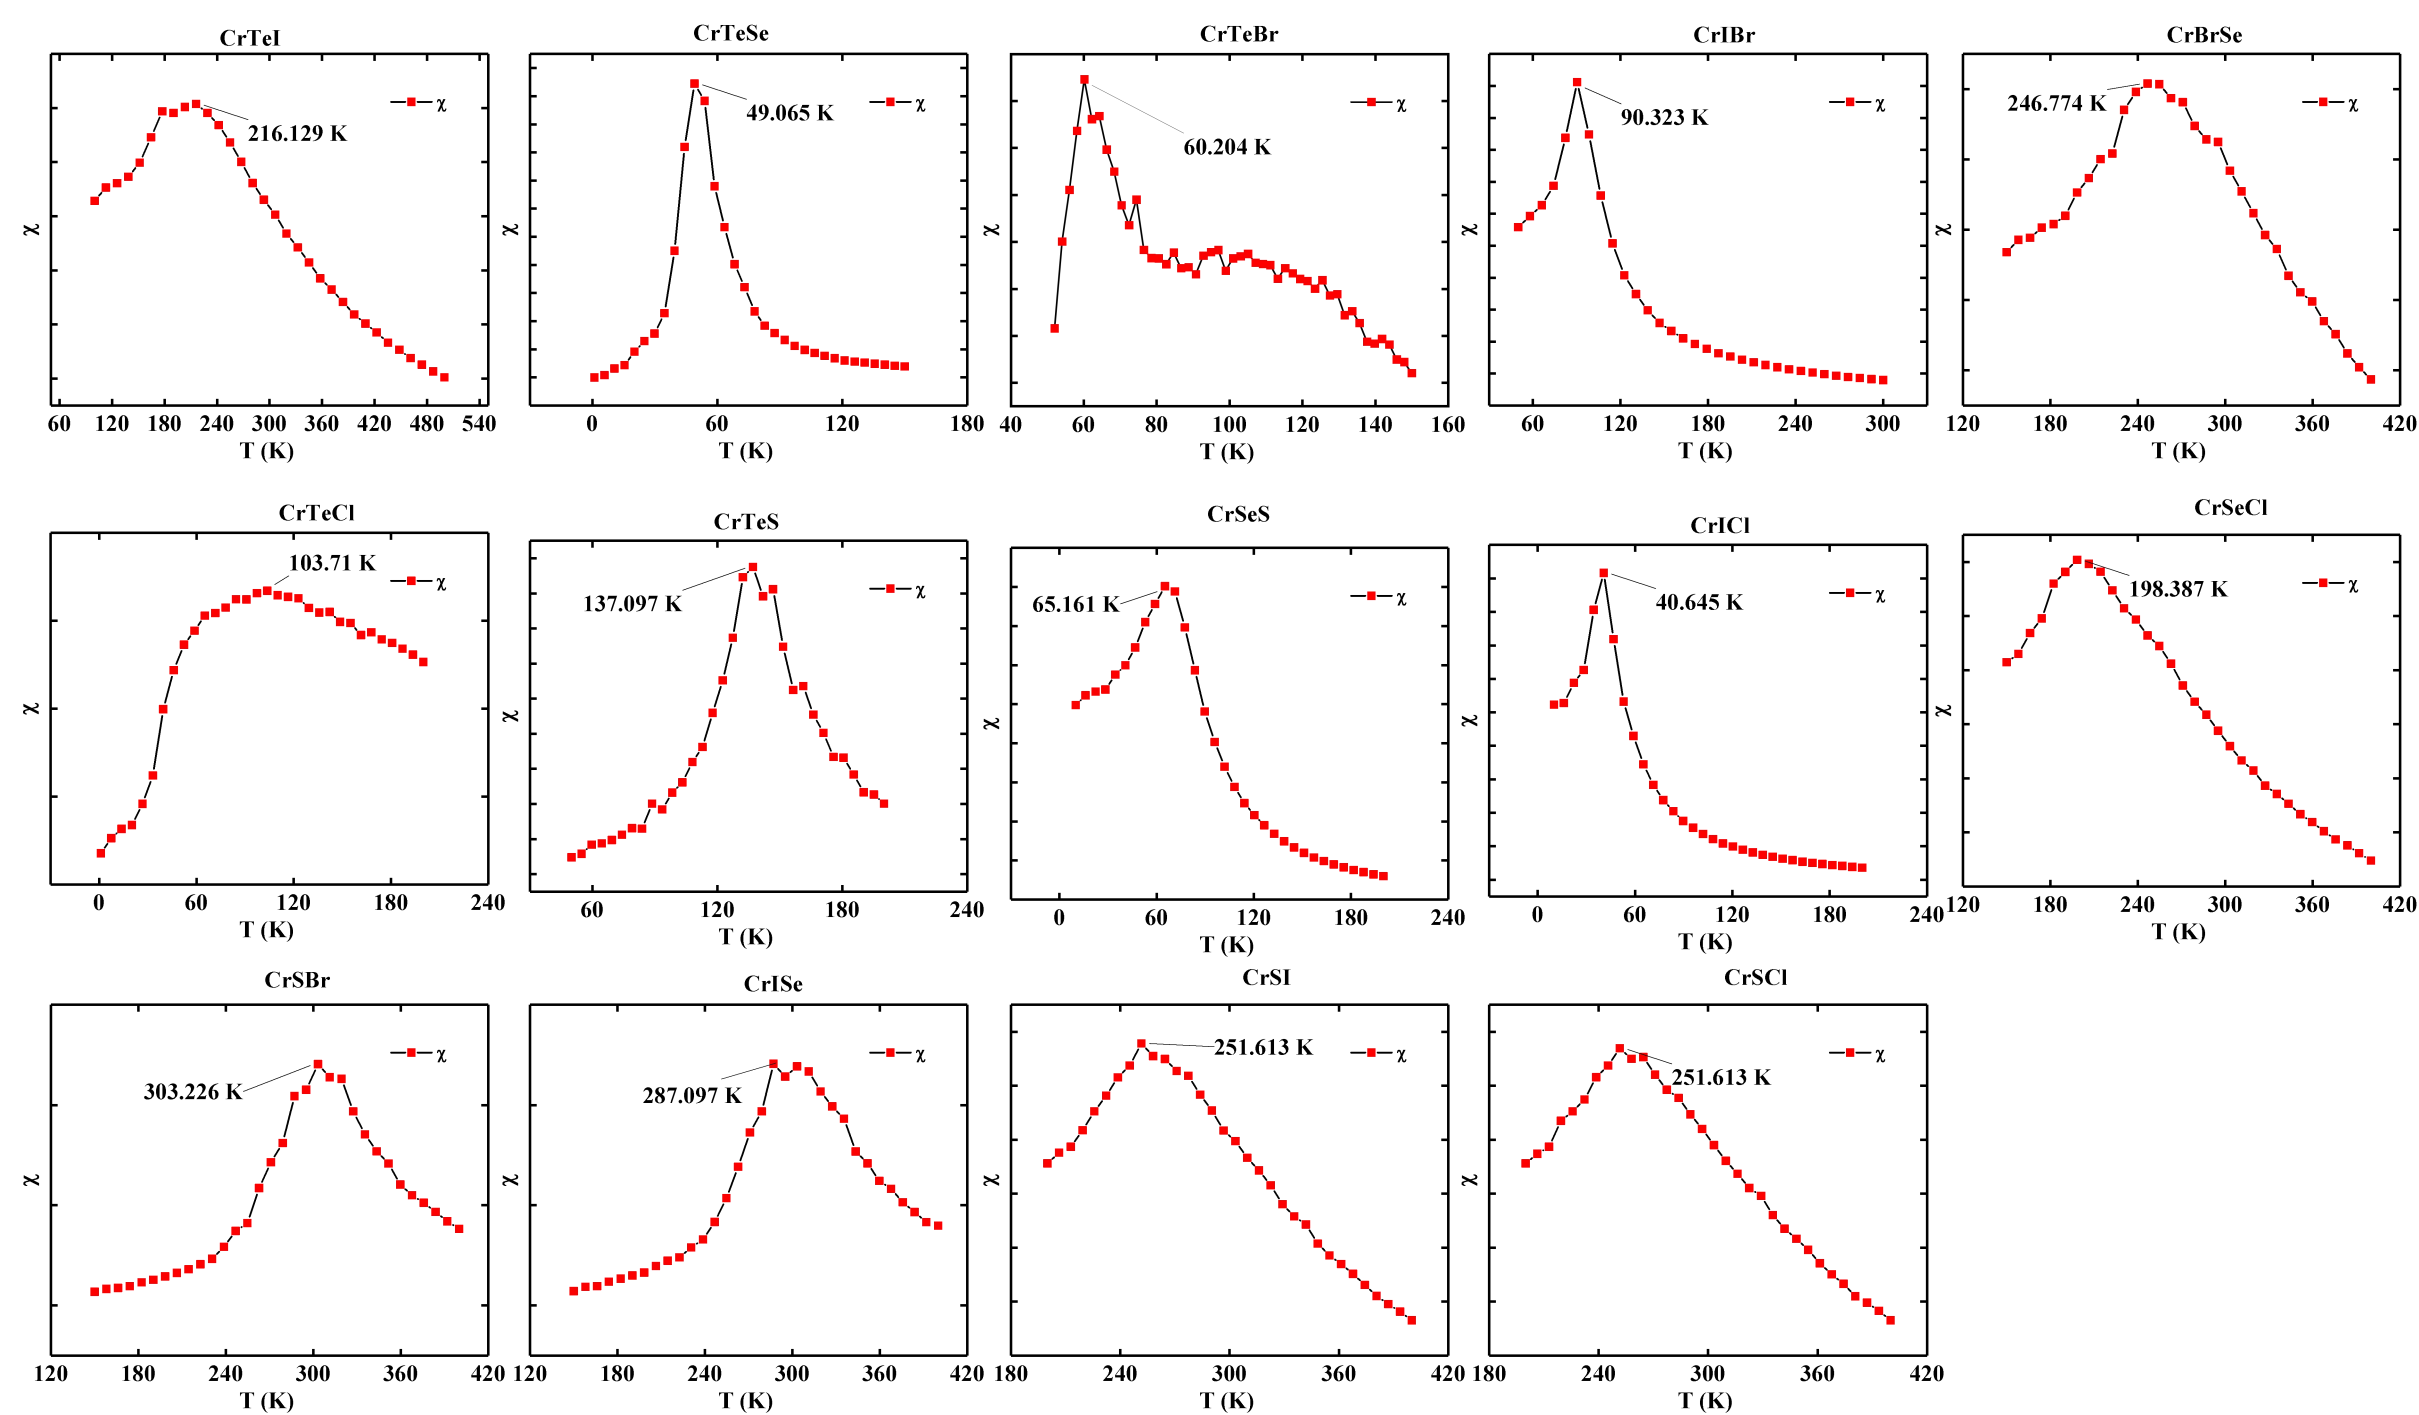

Supplement: d3cp02470a1.zip [file d3cp02470a1.zip]

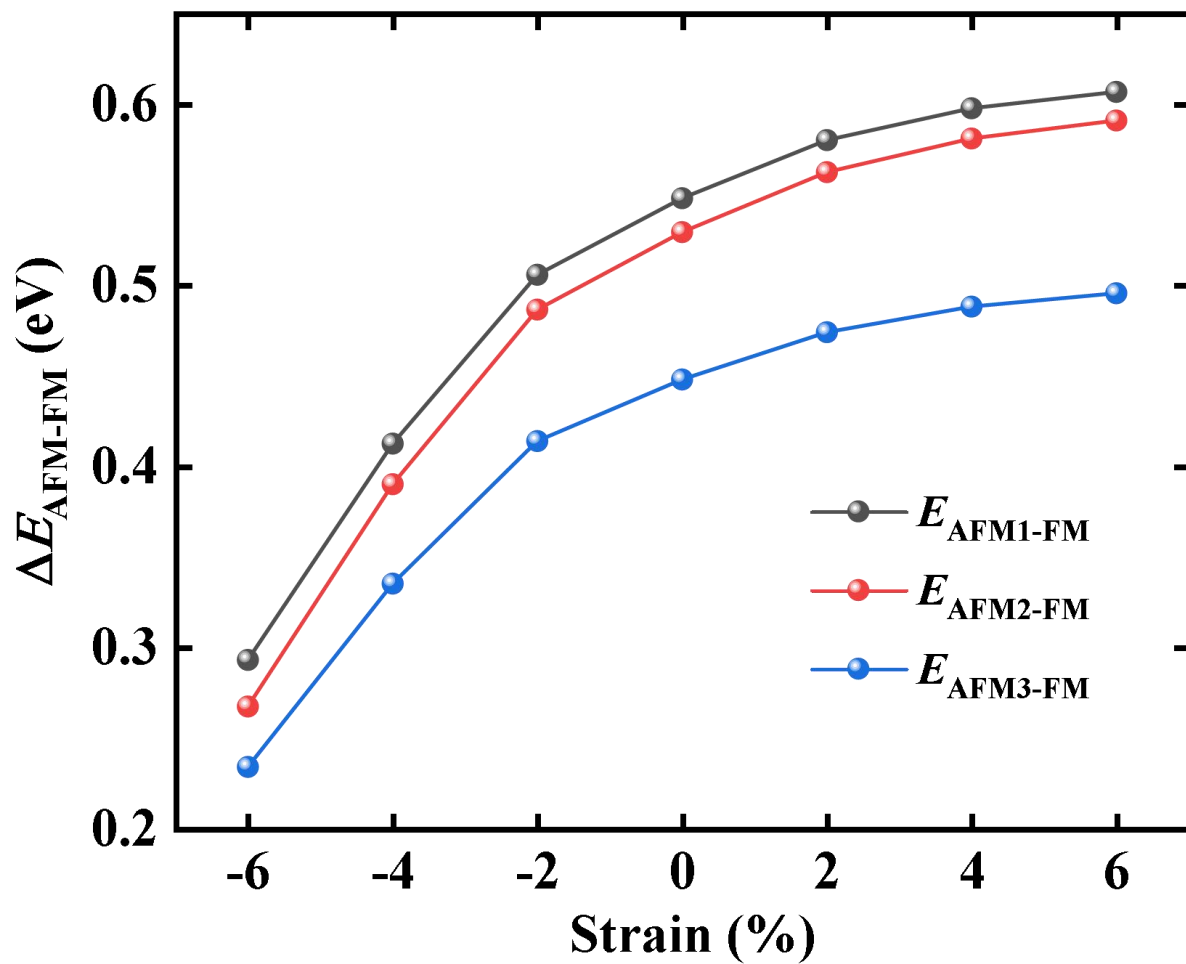

Supplement: d3cp02470a1.zip [file d3cp02470a1.zip]

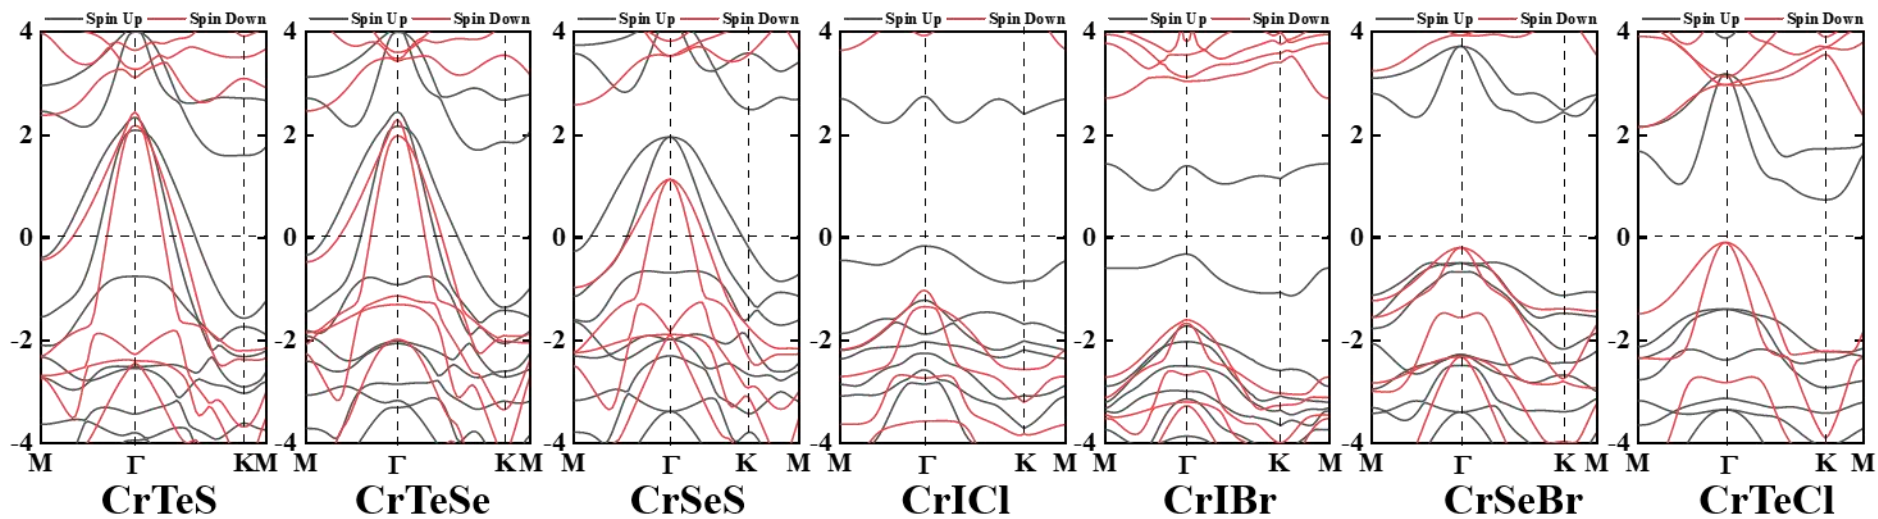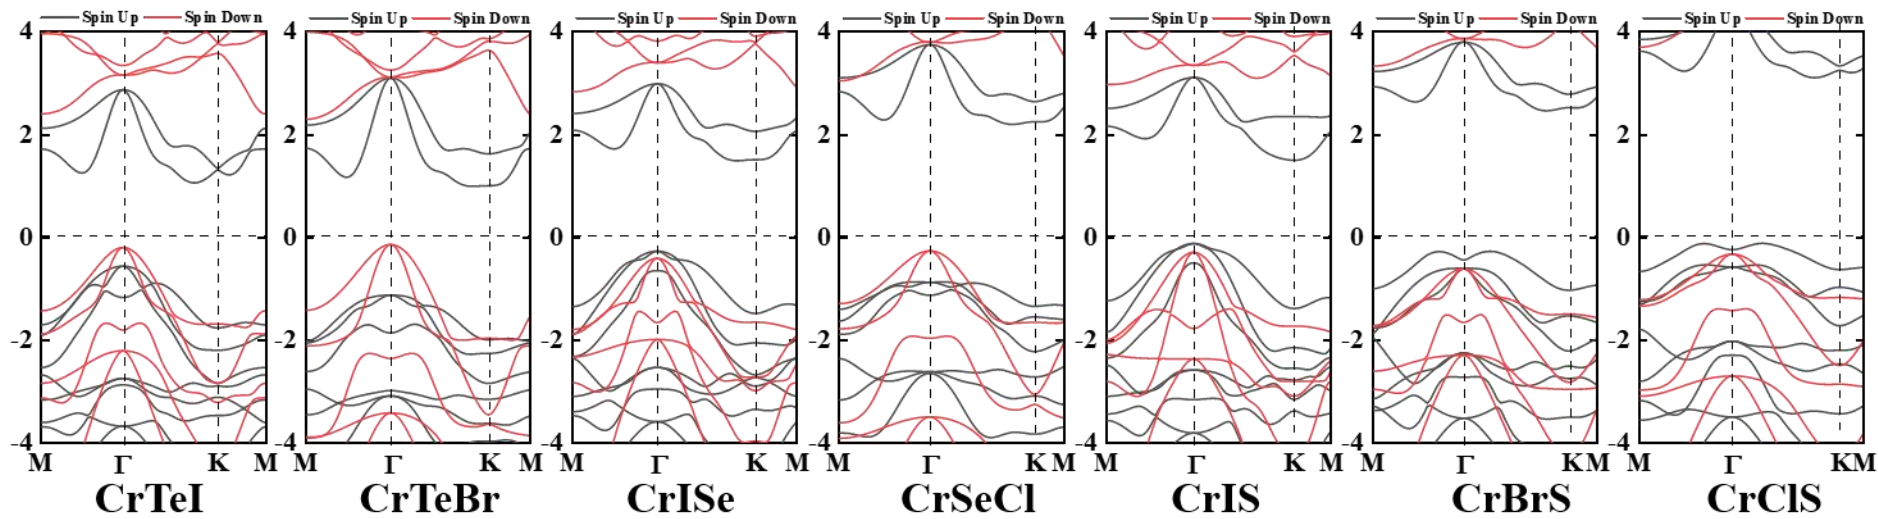

Supplement: d3cp02470a1.zip [file d3cp02470a1.zip]

**(a)**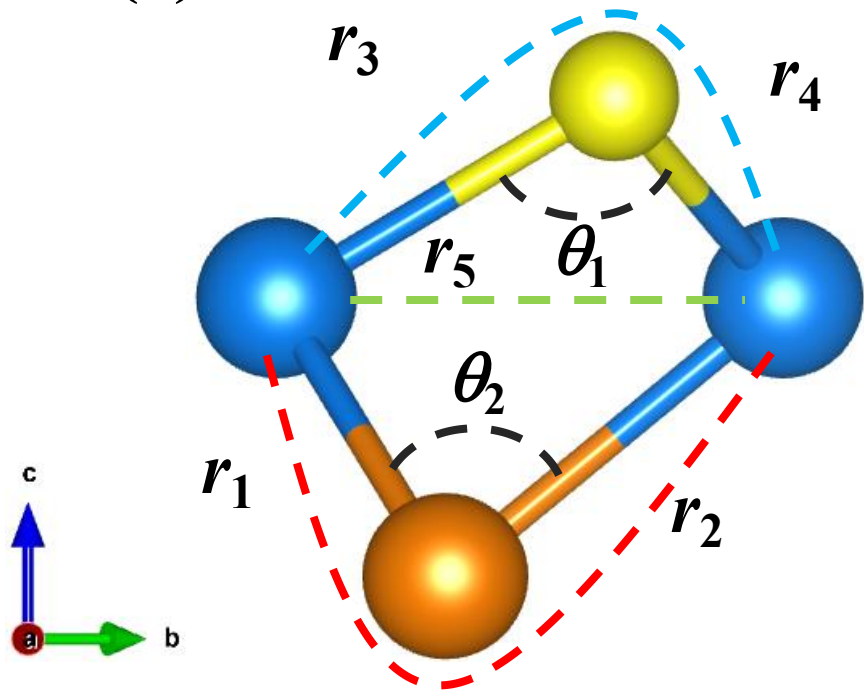**(b)**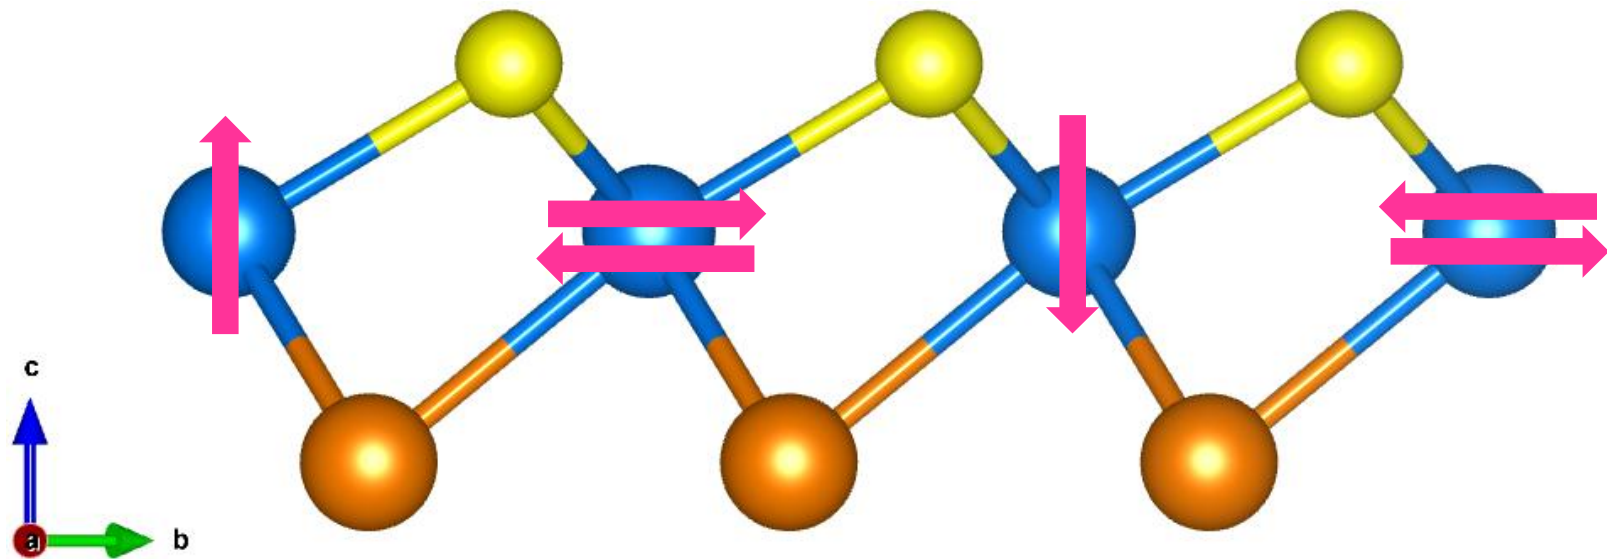

Supplement: d3cp02470a1.zip [file d3cp02470a1.zip]

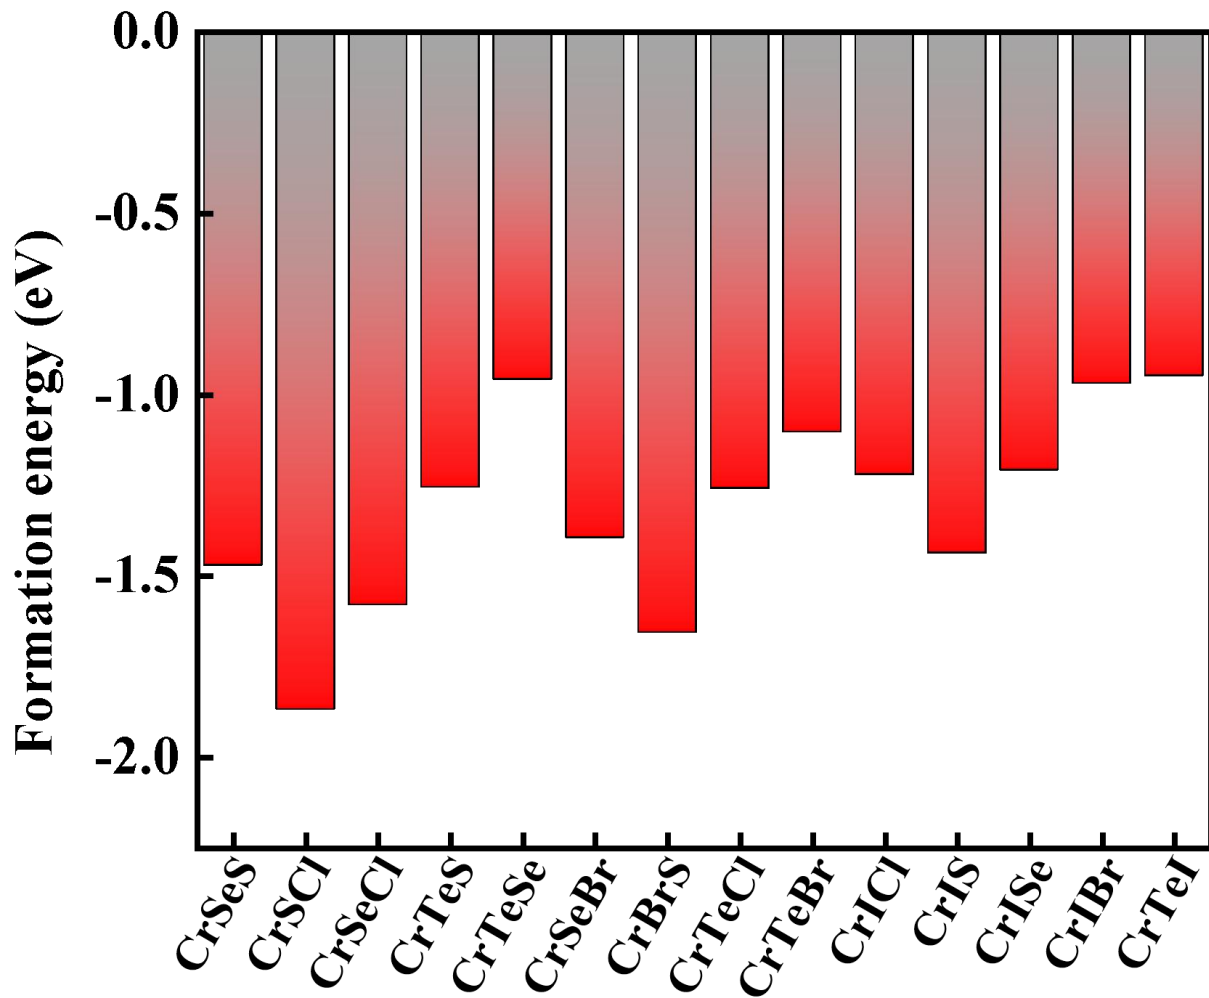

Supplement: d3cp02470a1.zip [file d3cp02470a1.zip]

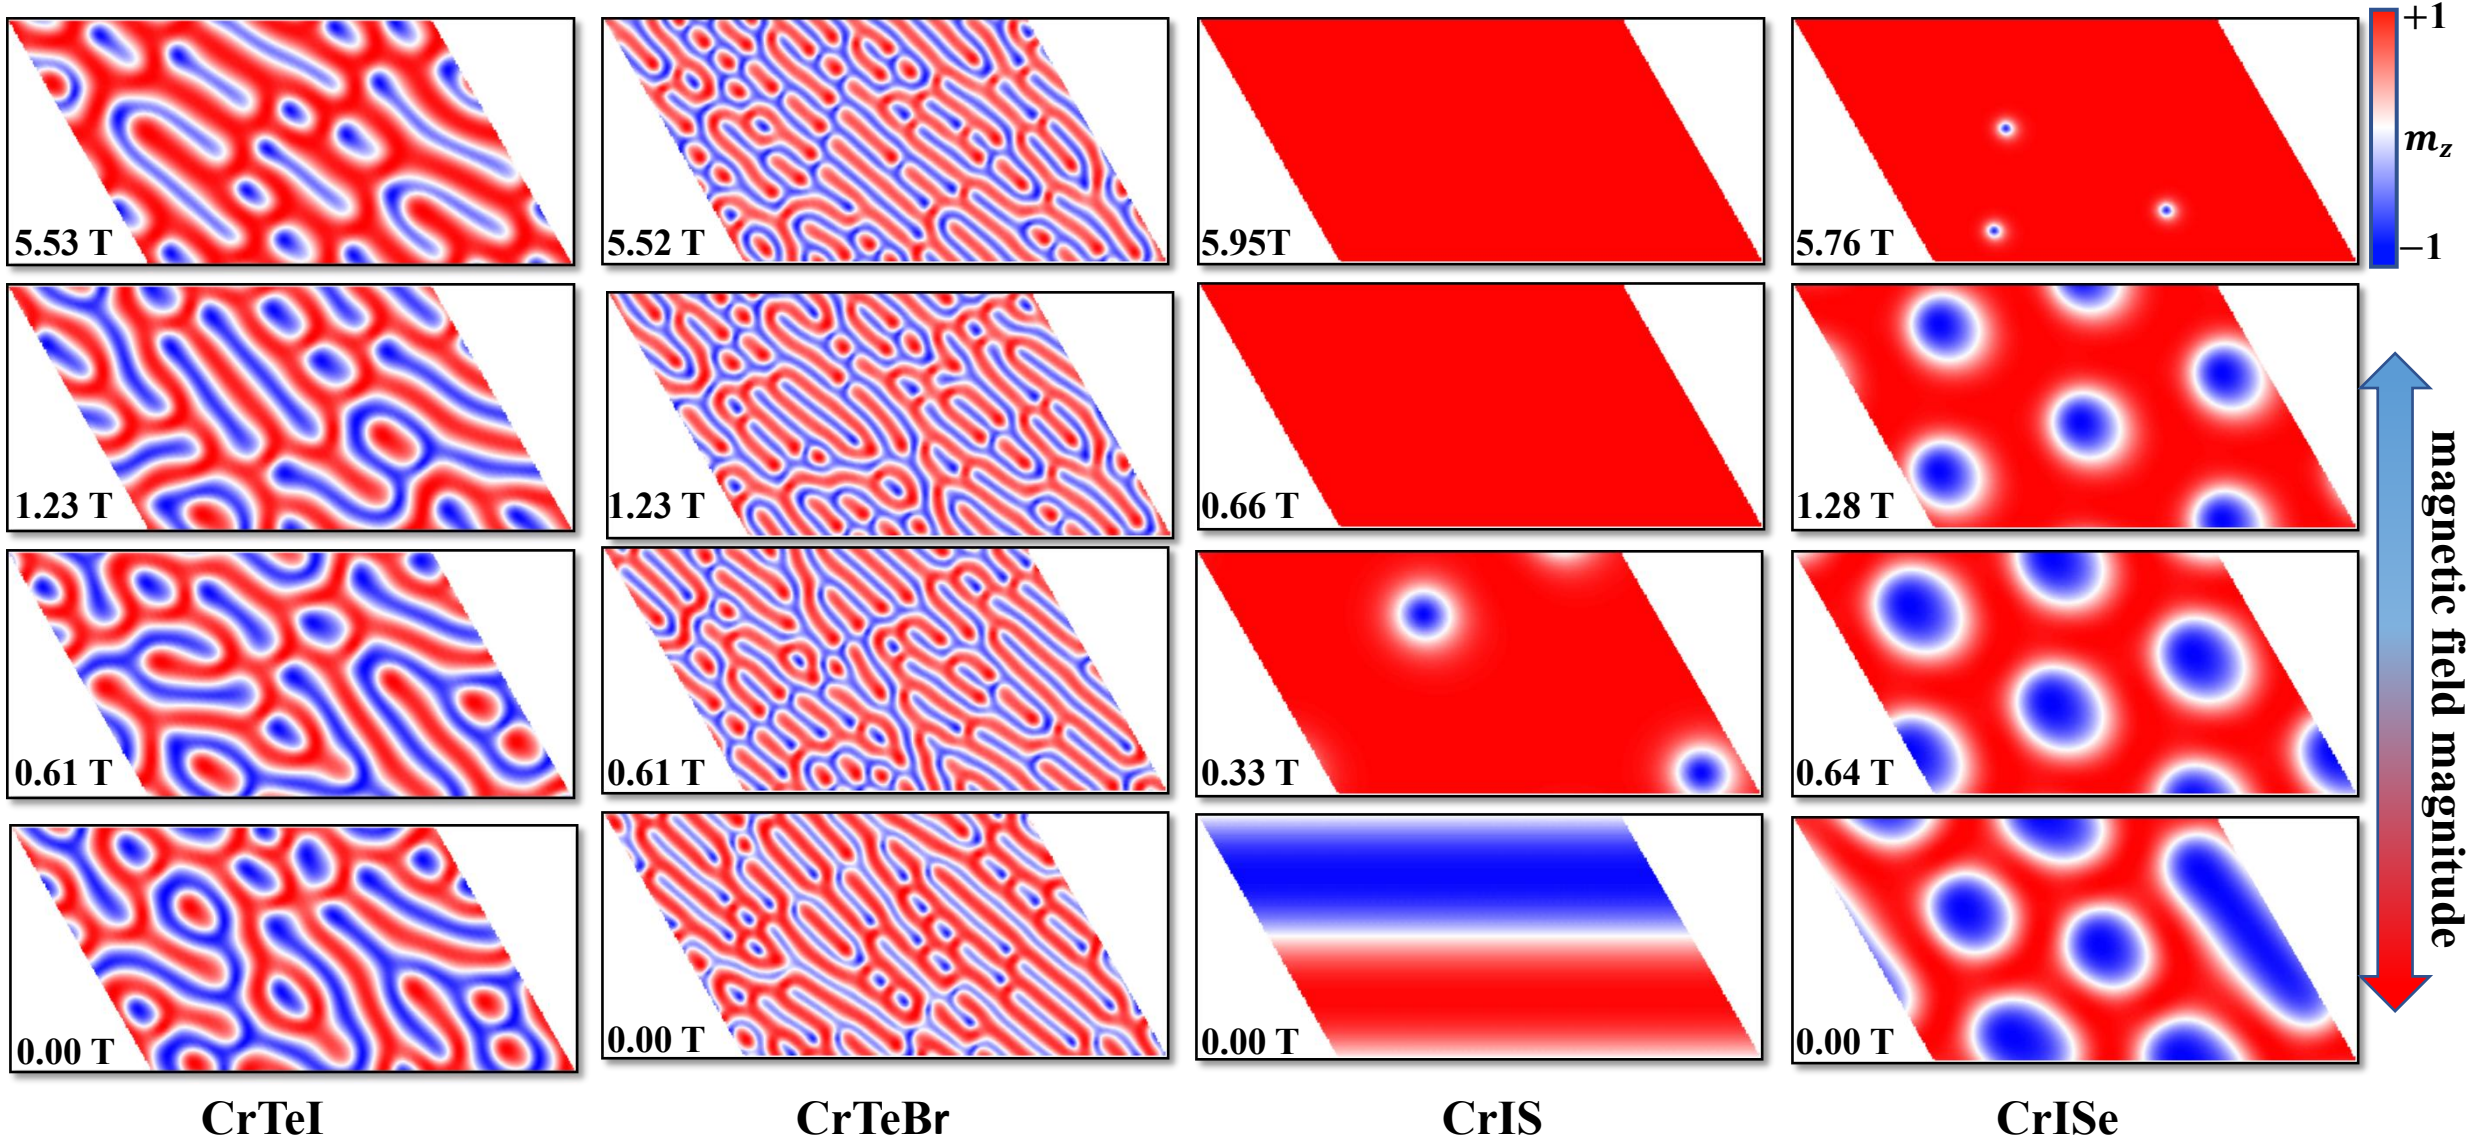

Supplement: d3cp02470a1.zip [file d3cp02470a1.zip]

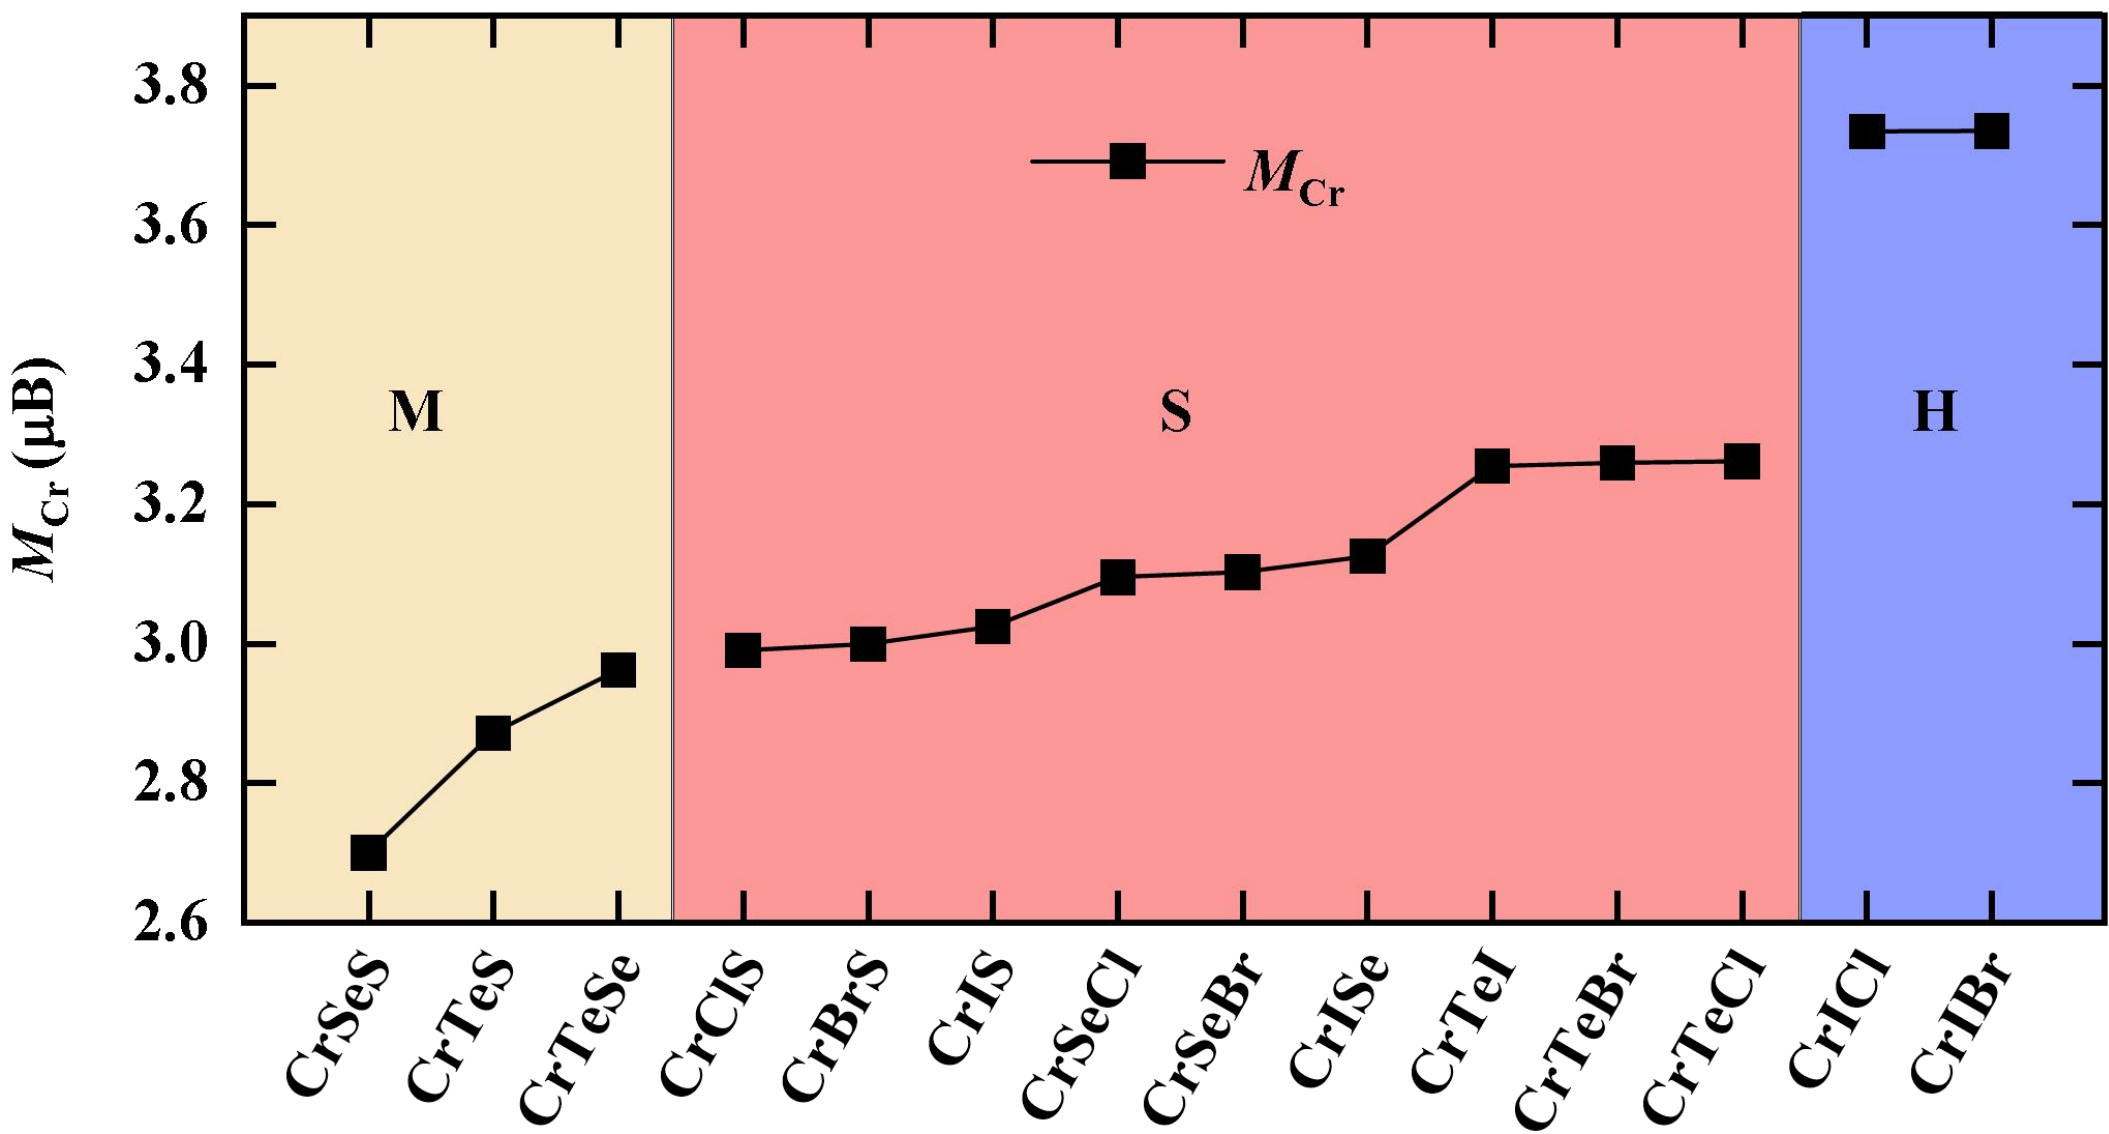

Supplement: d3cp02470a1.zip [file d3cp02470a1.zip]
